# Supplementary material for: Hyaluronic acid synthesis, degradation, and crosslinking in equine osteoarthritis: TNF-α-TSG-6-mediated HC-HA formation
Source: PubMed Central journal article supplement (PMC8377964; doi:10.1186/s13075-021-02588-7), 2021-08-20
Supplement: 13075_2021_2588_MOESM1_ESM.pdf [file 13075_2021_2588_MOESM1_ESM.pdf]

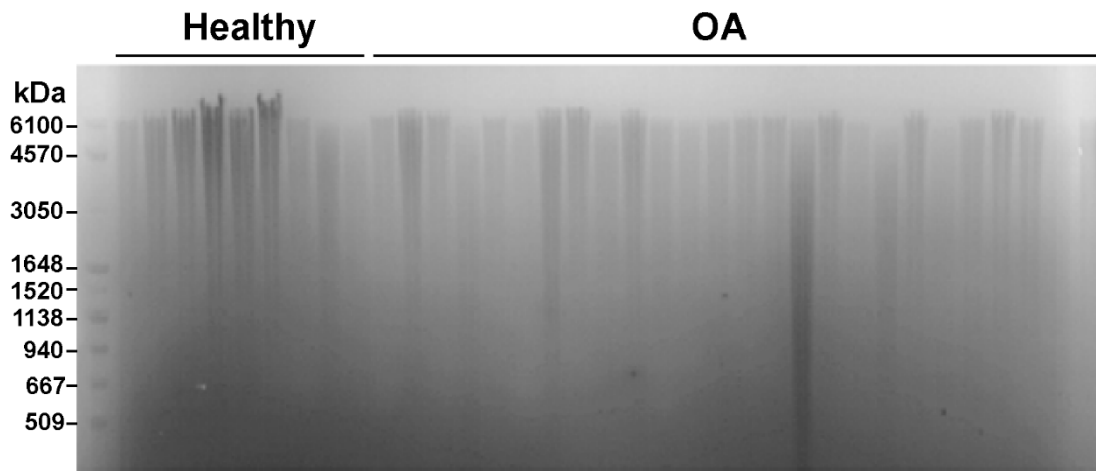

**Fig S1. Representative agarose gel electrophoretogram to measure HA distribution in equine synovial fluid.** Healthy: Synovial fluid (SF) was collected from healthy horses (9 lanes); OA: SF samples were collected from horses with OA (26 lanes). HA MW markers are shown in the 1<sup>st</sup> lane.
