# Supplementary material for: Hyaluronic acid synthesis, degradation, and crosslinking in equine osteoarthritis: TNF-α-TSG-6-mediated HC-HA formation
Source: PubMed Central journal article supplement (PMC8377964; doi:10.1186/s13075-021-02588-7), 2021-08-20
Supplement: 13075_2021_2588_MOESM2_ESM.pdf [file 13075_2021_2588_MOESM2_ESM.pdf]

**Table S1. Horse demographics and tissue disposition**

| Horse number | Breed | Age (years) | Sex            | OA grade | Healthy vs OA | SF volume (mL) | R&D HA ELISA | Echelon HA ELISA | HA gel | HC-HA complex | Cytokine | qRT-PCR |           | Immunostaining |           | MPTM | SS-nanopore |
|--------------|-------|-------------|----------------|----------|---------------|----------------|--------------|------------------|--------|---------------|----------|---------|-----------|----------------|-----------|------|-------------|
|              |       |             |                |          |               |                |              |                  |        |               |          | SM      | Cartilage | SM             | Cartilage |      |             |
| H1           | TB    | 3           | Castrated male | 0        | Healthy       | 9              | x            | x                | x      | x             | x        |         |           |                |           | x    | x           |
| H2           | QH    | 3           | Castrated male | 0        | Healthy       | 6.5            | x            | x                | x      | x             | x        |         |           |                |           | x    |             |
| H3           | WB    | 3           | Female         | 0        | Healthy       | NA             | x            | x                | x      | x             | x        | x       | x         |                |           | x    |             |
| H4           | Mixed | 5           | Castrated male | 0        | Healthy       | 3              | x            | x                | x      | x             | x        | x       | x         | x              | x         | x    | x           |
| H5           | TB    | 9           | Female         | 0        | Healthy       | 7              | x            | x                | x      | x             | x        |         |           |                |           | x    |             |
| H6           | TB    | 4           | Female         | 0        | Healthy       | 6              | x            | x                | x      | x             | x        | x       |           | x              |           | x    | x           |
| H7           | TB    | 7           | Castrated male | 0        | Healthy       | NA             | x            | x                | x      | x             |          | x       |           |                |           |      |             |
| H8           | TB    | 7           | Female         | 0        | Healthy       | NA             | x            | x                | x      | x             |          | x       |           |                |           |      |             |
| H9           | TB    | 5           | Female         | 0        | Healthy       | NA             | x            | x                | x      | x             | x        | x       | x         |                |           | x    | x           |
| H10          | STB   | 3           | Castrated male | 0        | Healthy       | 5.5            | x            | x                | x      | x             | x        |         |           |                |           | x    |             |
| H11          | TB    | 6           | Female         | 0        | Healthy       | NA             | x            | x                | x      | x             |          | x       | x         |                |           | x    |             |
| H12          | STB   | 5           | Castrated male | 0        | Healthy       | 7.5            | x            | x                | x      | x             | x        |         |           |                |           |      | x           |
| H13          | TB    | 3           | Female         | 0        | Healthy       | 6.5            | x            | x                | x      | x             | x        |         |           |                |           | x    |             |
| H14          | Cross | 5           | Female         | 0        | Healthy       | 5              | x            | x                | x      | x             | x        |         |           |                |           | x    |             |
| H15          | Cross | 5           | Female         | 0        | Healthy       | 5              | x            | x                | x      | x             | x        |         |           |                |           | x    |             |
| H16          | STB   | 3           | Castrated male | 0        | Healthy       | 5.8            | x            | x                | x      | x             | x        |         |           |                |           |      |             |
| H17          | Paint | 2           | Intact male    | 0        | Healthy       | 5.5            | x            | x                | x      | x             | x        | x       |           | x              | x         | x    | x           |
| H18          | TB    | 4           | Female         | 0        | Healthy       | 3.5            | x            | x                | x      | x             | x        | x       |           | x              | x         | x    |             |
| H19          | TB    | 6           | Intact male    | 0        | Healthy       | NA             | x            | x                | x      | x             |          | x       |           |                |           |      |             |
| H20          | TB    | 10          | Castrated male | 0        | Healthy       | 5.5            | x            | x                | x      | x             | x        |         |           |                |           | x    |             |
| H21          | TB    | 11          | Female         | 0        | Healthy       | 5.5            | x            | x                | x      | x             | x        |         |           |                |           |      |             |
| H22          | Cross | 5           | Female         | 0        | Healthy       | 5              | x            | x                | x      | x             | x        |         |           |                |           | x    |             |
| H23          | TB    | 5           | Intact male    | 0        | Healthy       | NA             | x            | x                | x      | x             |          | x       |           |                |           |      |             |
| H24          | Cross | 5           | Female         | 0        | Healthy       | 4              | x            | x                | x      | x             | x        |         |           |                |           | x    |             |
| H25          | TB    | 5           | Female         | 0        | Healthy       | 9              | x            | x                | x      | x             | x        |         |           |                |           | x    |             |
| OA1          | TB    | 22          | Female         | 1        | OA            | 7              | x            | x                | x      | x             | x        |         |           |                |           |      |             |
| OA2          | TB    | 1           | Female         | 1        | OA            | 1              | x            | x                | x      | x             | x        |         |           |                |           |      |             |
| OA3          | TB    | 2           | Female         | 1        | OA            | 5.5            | x            | x                | x      | x             | x        |         |           |                |           |      |             |
| OA4          | TB    | 2           | Female         | 1        | OA            | 4              | x            | x                | x      | x             | x        |         |           |                |           |      |             |

| Horse number | Breed | Age (years) | Sex            | OA grade | Healthy vs OA | SF volume (mL) | R&D HA ELISA | Echelon HA ELISA | HA gel | HC-HA complex | Cytokine | qRT-PCR |           | Immunostaining |           | MPTM | SS-nanopore |
|--------------|-------|-------------|----------------|----------|---------------|----------------|--------------|------------------|--------|---------------|----------|---------|-----------|----------------|-----------|------|-------------|
|              |       |             |                |          |               |                |              |                  |        |               |          | SM      | Cartilage | SM             | Cartilage |      |             |
| OA5          | TB    | 2           | Female         | 1        | OA            | 4.5            | x            | x                | x      | x             | x        |         |           |                |           |      |             |
| OA6          | TB    | 2           | Intact male    | 1        | OA            | 7.5            | x            | x                | x      | x             | x        | x       | x         | x              | x         | x    | x           |
| OA7          | TB    | 3           | Intact male    | 1        | OA            | 6              | x            | x                | x      | x             | x        | x       |           |                |           |      |             |
| OA8          | TB    | 4           | Female         | 1        | OA            | NA             | x            | x                | x      | x             | x        | x       | x         |                |           |      |             |
| OA9          | STB   | 5           | Castrated male | 1        | OA            | 7              | x            | x                | x      | x             | x        |         |           |                |           |      |             |
| OA10         | TB    | 2           | Intact male    | 1        | OA            | NA             | x            | x                | x      | x             | x        | x       |           |                |           | x    | x           |
| OA11         | TB    | 9           | Female         | 1        | OA            | 4.5            | x            | x                | x      | x             | x        |         |           |                |           |      |             |
| OA12         | TB    | 4           | Female         | 1        | OA            | 1.8            | x            | x                | x      | x             | x        | x       |           |                |           |      |             |
| OA13         | TB    | 3           | Female         | 1        | OA            | 7              | x            | x                | x      | x             | x        | x       |           |                |           | x    | x           |
| OA14         | TB    | 2           | Female         | 1        | OA            | 4              | x            | x                | x      | x             | x        |         |           |                |           |      |             |
| OA15         | STB   | 3           | Intact male    | 1        | OA            | 2.8            | x            | x                | x      | x             | x        | x       |           |                |           | x    | x           |
| OA16         | TB    | 3           | Female         | 1        | OA            | 1.2            | x            | x                | x      | x             | x        |         |           |                |           |      |             |
| OA17         | TB    | 2           | Female         | 1        | OA            | 9.5            | x            | x                | x      | x             | x        |         |           |                |           |      |             |
| OA18         | TB    | 4           | Female         | 1        | OA            | NA             | x            | x                | x      | x             | x        |         |           |                |           |      |             |
| OA19         | STB   | 2           | Female         | 1        | OA            | 5              | x            | x                | x      | x             | x        |         | x         |                |           |      |             |
| OA20         | TB    | 2           | Castrated male | 1        | OA            | 3.6            | x            | x                | x      | x             | x        |         |           |                |           |      |             |
| OA21         | STB   | 2           | Castrated male | 1        | OA            | 10             | x            | x                | x      | x             | x        | x       |           |                |           | x    | x           |
| OA22         | TB    | 5           | Intact male    | 1        | OA            | 7              |              |                  |        |               |          |         |           |                |           |      | x           |
| OA23         | TB    | 3           | Female         | 2        | OA            | 10             | x            | x                | x      | x             | x        |         |           |                |           |      |             |
| OA24         | TB    | 4           | Castrated male | 2        | OA            | 0.5            | x            | x                | x      | x             | x        |         |           |                |           |      |             |
| OA25         | STB   | 4           | Female         | 2        | OA            | NA             | x            | x                | x      | x             |          | x       |           |                |           |      |             |
| OA26         | TB    | 2           | Intact male    | 2        | OA            | 8              | x            | x                | x      | x             | x        |         |           |                |           |      |             |
| OA27         | TB    | 3           | Female         | 2        | OA            | 5.5            | x            | x                | x      | x             | x        |         |           |                |           |      |             |
| OA28         | TB    | 2           | Female         | 2        | OA            | 10             | x            | x                | x      | x             | x        | x       | x         |                |           | x    | x           |
| OA29         | TB    | 4           | Female         | 2        | OA            | 1.2            | x            | x                | x      | x             | x        |         |           |                |           |      |             |
| OA30         | TB    | 4           | Female         | 2        | OA            | 1.2            | x            | x                | x      | x             | x        | x       |           |                |           | x    | x           |
| OA31         | QH    | 13          | Female         | 2        | OA            | 2              | x            | x                | x      | x             | x        |         |           |                |           |      |             |
| OA32         | TB    | 2           | Female         | 2        | OA            | 1.5            | x            | x                | x      | x             | x        | x       | x         |                |           | x    | x           |
| OA33         | TB    | 5           | Female         | 2        | OA            | 5              | x            | x                | x      | x             | x        |         |           |                |           |      |             |
| OA34         | TB    | 3           | Castrated male | 2        | OA            | 4              | x            | x                | x      | x             | x        | x       |           |                |           | x    | x           |
| OA35         | TB    | 3           | Female         | 2        | OA            | 5              | x            | x                | x      | x             | x        |         | x         |                |           | x    | x           |
| OA36         | TB    | 3           | Female         | 2        | OA            | 3.5            | x            | x                | x      | x             | x        |         |           | x              |           |      |             |

| Horse number | Breed | Age (years) | Sex            | OA grade | Healthy vs OA | SF volume (mL) | R&D HA ELISA | Echelon HA ELISA | HA gel | HC-HA complex | Cytokine | qRT-PCR |           | Immunostaining |           | MPTM | SS-nanopore |
|--------------|-------|-------------|----------------|----------|---------------|----------------|--------------|------------------|--------|---------------|----------|---------|-----------|----------------|-----------|------|-------------|
|              |       |             |                |          |               |                |              |                  |        |               |          | SM      | Cartilage | SM             | Cartilage |      |             |
| OA37         | TB    | 3           | Intact male    | 2        | OA            | 3              | x            | x                | x      | x             | x        |         |           |                |           |      |             |
| OA38         | STB   | 5           | Intact male    | 2        | OA            | 5              | x            | x                | x      | x             | x        |         |           |                |           |      |             |
| OA39         | TB    | 4           | Female         | 2        | OA            | 4              | x            | x                | x      | x             | x        | x       | x         |                |           | x    | x           |
| OA40         | TB    | 4           | Female         | 2        | OA            | NA             | x            | x                | x      | x             |          | x       |           |                |           |      |             |
| OA41         | TB    | 3           | Female         | 2        | OA            | 1              | x            | x                | x      | x             | x        | x       |           | x              |           | x    |             |
| OA42         | TB    | 4           | Intact male    | 2        | OA            | 4.5            | x            | x                | x      | x             | x        |         |           |                |           |      |             |
| OA43         | TB    | 4           | Female         | 2        | OA            | 1.4            | x            | x                | x      | x             | x        |         |           |                |           |      |             |
| OA44         | TB    | 2           | Female         | 2        | OA            | NA             | x            | x                | x      | x             |          | x       | x         |                |           |      |             |
| OA45         | TB    | 3           | Female         | 2        | OA            | 5              | x            | x                | x      | x             | x        |         |           |                |           |      |             |
| OA46         | TB    | 2           | Female         | 2        | OA            | 2.5            | x            | x                | x      | x             | x        |         |           | x              |           |      |             |
| OA47         | STB   | 7           | Castrated male | 2        | OA            | NA             | x            | x                | x      | x             |          | x       | x         |                |           |      |             |
| OA48         | QH    | 13          | Castrated male | 2        | OA            | 3              | x            | x                | x      | x             | x        |         |           |                |           |      |             |
| OA49         | STB   | 3           | Castrated male | 3        | OA            | 5.1            | x            | x                | x      | x             | x        |         |           |                |           |      |             |
| OA50         | QH    | 7           | Female         | 3        | OA            | 3              | x            | x                | x      | x             | x        | x       |           |                |           | x    |             |
| OA51         | QH    | 10          | Female         | 3        | OA            | 3              | x            | x                | x      | x             | x        |         |           |                |           |      | x           |
| OA52         | TB    | 4           | Female         | 3        | OA            | NA             | x            | x                | x      | x             |          | x       |           |                |           |      |             |
| OA53         | TB    | 6           | Castrated male | 3        | OA            | 3              | x            | x                | x      | x             | x        |         |           |                |           |      |             |
| OA54         | QH    | 20          | Castrated male | 3        | OA            | 0.5            | x            | x                | x      | x             |          | x       |           |                | x         |      |             |
| OA55         | TB    | 3           | Castrated male | 3        | OA            | 5              | x            | x                | x      | x             | x        |         |           |                |           |      | x           |
| OA56         | TB    | 5           | Female         | 3        | OA            | NA             | x            | x                | x      | x             | x        | x       | x         |                |           | x    | x           |
| OA57         | TB    | 2           | Castrated male | 3        | OA            | 8.5            | x            | x                | x      | x             | x        |         |           |                |           |      |             |
| OA58         | STB   | 3           | Intact male    | 3        | OA            | NA             | x            | x                | x      | x             |          | x       | x         |                |           |      |             |
| OA59         | TB    | 6           | Female         | 3        | OA            | 7.5            | x            | x                | x      | x             | x        |         | x         | x              | x         |      |             |
| OA60         | QH    | 9           | Castrated male | 3        | OA            | 6.5            | x            | x                | x      | x             | x        | x       |           |                |           | x    | x           |
| OA61         | TB    | 4           | Female         | 3        | OA            | NA             | x            | x                | x      | x             | x        | x       | x         |                |           | x    | x           |
| OA62         | TB    | 19          | Female         | 3        | OA            | 5              | x            | x                | x      | x             | x        |         |           |                |           | x    | x           |
| OA63         | TB    | 7           | Castrated male | 3        | OA            | 5.5            |              |                  |        |               |          |         |           |                | x         |      |             |

Mean = 4.9

NA: Not applicable, this information was not available from patient records.

QH: Quarter Horse  
STB: Standardbred  
TB: Thoroughbred  
WB: Warmblood
