# Supplementary material for: Hyaluronic acid synthesis, degradation, and crosslinking in equine osteoarthritis: TNF-α-TSG-6-mediated HC-HA formation
Source: PubMed Central journal article supplement (PMC8377964; doi:10.1186/s13075-021-02588-7), 2021-08-20
Supplement: 13075_2021_2588_MOESM3_ESM.pdf [file 13075_2021_2588_MOESM3_ESM.pdf]

**Table S2. qRT-PCR checklist**

| <b>Sample preservation/RNA template</b>   | <b>Details</b>                                                                                                                                                                                                                                                                                                                   |
|-------------------------------------------|----------------------------------------------------------------------------------------------------------------------------------------------------------------------------------------------------------------------------------------------------------------------------------------------------------------------------------|
| Source                                    | Synovial membrane and articular cartilage tissues were collected from the carpal joints of horses ( <i>Equus caballus</i> ) with healthy joints or osteoarthritic (OA) joints.                                                                                                                                                   |
| Sample preservation                       | Synovial membrane and articular cartilage tissues were frozen in liquid nitrogen after collection and stored at -70°C.                                                                                                                                                                                                           |
| Sample grinding and storage               | Frozen samples were crushed and ground into fine powder with a mortar & pestle and stored at -70°C.                                                                                                                                                                                                                              |
| RNA extraction and removal of genomic DNA | Total RNA was extracted from synovial membrane using the E.Z.N.A Tissue RNA Kit (Omega BioTek, Inc., Norcross, GA) or from cartilage with the RNeasy Lipid Tissue Mini Kit (QIAGEN Sciences Inc., Germantown, MD). Residual genomic DNA was removed by DNase I on-column digestion. The extracted total RNA was stored at -70°C. |
| RNA concentration and integrity           | RNA concentration and quality were assessed using a Tecan Spark 10M multimode plate reader with a NanoQuant Plate™ (to detect 16 samples per assay).                                                                                                                                                                             |
| <b>Genes assayed</b>                      | <b>Accession number</b>                                                                                                                                                                                                                                                                                                          |
| Equine <i>HAS1</i>                        | XM_023650323.1                                                                                                                                                                                                                                                                                                                   |
| Equine <i>HAS2</i>                        | NM_001081801.2                                                                                                                                                                                                                                                                                                                   |
| Equine <i>HAS3</i>                        | XM_023637194.1                                                                                                                                                                                                                                                                                                                   |
| Equine <i>TSG6</i>                        | NM_001081906.1                                                                                                                                                                                                                                                                                                                   |
| Equine <i>HYAL2</i>                       | XM_014731656.1                                                                                                                                                                                                                                                                                                                   |
| Equine <i>HEXA</i>                        | XM_001494311.4                                                                                                                                                                                                                                                                                                                   |
| Equine 18S rRNA                           | NR_046271.1                                                                                                                                                                                                                                                                                                                      |
| <b>Primers and amplicon</b>               | <b>Sequences or size</b>                                                                                                                                                                                                                                                                                                         |
| EqHAS1 Forward                            | GCGATACTGGGTGGCCTTCAATGT                                                                                                                                                                                                                                                                                                         |
| EqHAS1 Reverse                            | CTGTATAGGCCTAGGGGACCACTG                                                                                                                                                                                                                                                                                                         |
| EqHAS1 amplicon size                      | 90-bp                                                                                                                                                                                                                                                                                                                            |
| EqHAS2 Forward                            | GGCCGGTCGTCTCAAATTCA                                                                                                                                                                                                                                                                                                             |
| EqHAS2 Reverse                            | TCACAATGCATCTTGTTTCAGCTC                                                                                                                                                                                                                                                                                                         |
| EqHAS2 amplicon size                      | 132-bp                                                                                                                                                                                                                                                                                                                           |
| EqHAS3 Forward                            | CGTGGGCGCATCTGGAACATT                                                                                                                                                                                                                                                                                                            |
| EqHAS3 Reverse                            | CTCTGCATTGCCCGAAGGAAG                                                                                                                                                                                                                                                                                                            |
| EqHAS3 amplicon size                      | 99-bp                                                                                                                                                                                                                                                                                                                            |
| EqTSG6 Forward                            | ATCCTGAGCAGCCCCTAACA                                                                                                                                                                                                                                                                                                             |
| EqTSG6 Reverse                            | TTGAATCCCATCCGTGAGC                                                                                                                                                                                                                                                                                                              |
| EqTSG6 amplicon size                      | 108-bp                                                                                                                                                                                                                                                                                                                           |
| EqHYAL2 Forward                           | CTCACAGGGCTTAGCGAGAT                                                                                                                                                                                                                                                                                                             |
| EqHYAL2 Reverse                           | GGTACTGGCAGGTCTCCGTG                                                                                                                                                                                                                                                                                                             |
| EqHYAL2 amplicon size                     | 124-bp                                                                                                                                                                                                                                                                                                                           |
| EqHEXA Forward                            | AAGGAGCTGGAAGTGGTCAC                                                                                                                                                                                                                                                                                                             |
| EqHEXA Reverse                            | TCAGGGGTACCGTCAAATGC                                                                                                                                                                                                                                                                                                             |
| EqHEXA amplicon size                      | 137-bp                                                                                                                                                                                                                                                                                                                           |
| Eq18S rRNA Forward                        | GGCGTCCCCCAACTTCTT                                                                                                                                                                                                                                                                                                               |
| Eq18S rRNA Reverse                        | AGGGCATCACAGACCTGTTATTG                                                                                                                                                                                                                                                                                                          |
| Eq18S rRNA amplicon size                  | 77-bp                                                                                                                                                                                                                                                                                                                            |
| Primer design                             | Primers were designed using NCBI Primer 3-Blast or Lasergene (DNASTAR, Madison, WI).                                                                                                                                                                                                                                             |
| <b>SYBR Green qRT-PCR Protocol</b>        | <b>Details</b>                                                                                                                                                                                                                                                                                                                   |
| SYBR Green qRT-PCR kit                    | SYBR Green RNA-to-C <sub>T</sub> one-step kit (Applied Biosystems, Foster City, CA) was used.                                                                                                                                                                                                                                    |

|                                         |                                                                                                                                                                                                                                                                             |
|-----------------------------------------|-----------------------------------------------------------------------------------------------------------------------------------------------------------------------------------------------------------------------------------------------------------------------------|
| RT & qPCR                               | RT and qPCR were carried out in the same well using the SYBR Green one-step kit. Equal amounts of total RNA (30 ng per reaction in 20 µl reaction mix for synovial membrane or 15 ng in 10 µl reaction mix for cartilage) were used, and all samples were run in duplicate. |
| No template control (NTC)               | NTCs were included in each run with each primer set.                                                                                                                                                                                                                        |
| Calculation of relative gene expression | Relative gene expression was analyzed using the $2^{-\Delta\Delta CT}$ method. The fold change was calculated using the median of healthy samples as 1.                                                                                                                     |
| Data Normalization                      | All data were normalized to equine 18S rRNA values.                                                                                                                                                                                                                         |
